# Supplementary material for: Genome–wide association study for risk taking propensity indicates shared pathways with body mass index
Source: PubMed Central journal article supplement (PMC6123697; doi:10.1038/s42003-018-0042-6), 2018-05-03
Supplement: 42003_2018_42_MOESM1_ESM.pdf [file 42003_2018_42_MOESM1_ESM.pdf]

**Supplementary Table 1** Look up of genome-wide significant SNPs for risk-taking in UK Biobank for 'Ever smoking'

| SNP        | Chr | Base pair | Effect allele | Other allele | Effect allele frequency | Info     | Beta       | SE       | P-val    |
|------------|-----|-----------|---------------|--------------|-------------------------|----------|------------|----------|----------|
| rs6762267  | 3   | 85513115  | C             | A            | 0.381262                | 0.998347 | 0.0094076  | 0.001051 | 3.40E-19 |
| rs727644   | 7   | 114109349 | G             | A            | 0.595406                | 0.992547 | 0.0013696  | 0.001045 | 1.90E-01 |
| rs62519827 | 8   | 65481947  | T             | C            | 0.887242                | 1        | 0.0011878  | 0.001616 | 4.60E-01 |
| rs9841382  | 3   | 181408124 | C             | T            | 0.144996                | 0.992706 | 0.0059097  | 0.001453 | 4.70E-05 |
| rs58560561 | 1   | 243537729 | G             | T            | 0.651824                | 0.985229 | -8.50E-05  | 0.001078 | 9.40E-01 |
| rs992493   | 4   | 106180264 | T             | C            | 0.188643                | 0.99873  | 0.0049033  | 0.001307 | 1.80E-04 |
| rs6923811  | 6   | 27289776  | T             | C            | 0.678951                | 1        | 0.004272   | 0.001097 | 9.90E-05 |
| rs7817124  | 8   | 81404008  | C             | G            | 0.239069                | 0.997976 | 0.0022905  | 0.001199 | 5.60E-02 |
| rs4801000  | 18  | 53456943  | G             | A            | 0.33539                 | 0.997479 | 0.0023003  | 0.001083 | 3.40E-02 |
| rs4653015  | 1   | 33776431  | T             | C            | 0.26086                 | 0.994959 | 0.0026161  | 0.001164 | 2.50E-02 |
| rs12476923 | 2   | 145830053 | A             | C            | 0.336033                | 0.999171 | -0.0007015 | 0.001078 | 5.20E-01 |
| rs283914   | 3   | 17330649  | T             | C            | 0.531356                | 0.997244 | 0.0019071  | 0.001024 | 6.20E-02 |
| rs4233093  | 1   | 73446245  | A             | G            | 0.516179                | 0.997724 | 0.0050554  | 0.001022 | 7.60E-07 |
| rs7829912  | 8   | 33479228  | T             | C            | 0.555727                | 0.991336 | 0.001943   | 0.001031 | 6.00E-02 |
| rs3117340  | 6   | 29210596  | G             | T            | 0.622344                | 0.999729 | 0.0051953  | 0.001055 | 8.50E-07 |
| rs1381287  | 14  | 98597552  | T             | C            | 0.456905                | 0.986444 | 0.0050533  | 0.001032 | 9.80E-07 |
| rs28520003 | 22  | 46411969  | G             | A            | 0.68587                 | 1        | 0.0057744  | 0.001102 | 1.60E-07 |
| rs12115650 | 9   | 126367705 | G             | A            | 0.725133                | 0.986183 | -0.00184   | 0.001151 | 1.10E-01 |
| rs11226319 | 11  | 104221573 | A             | G            | 0.160313                | 0.994423 | -0.0015943 | 0.001394 | 2.50E-01 |
| rs1358391  | 7   | 115111838 | G             | T            | 0.505524                | 0.986954 | 0.0050478  | 0.001027 | 8.80E-07 |
| rs12617392 | 2   | 27336827  | C             | A            | 0.558239                | 0.992674 | -0.0003932 | 0.00103  | 7.00E-01 |
| rs542883   | 2   | 45143382  | C             | G            | 0.559253                | 0.995628 | 0.0079359  | 0.001029 | 1.20E-14 |
| rs10823791 | 10  | 73338334  | T             | A            | 0.398774                | 0.997238 | 0.00158    | 0.001045 | 1.30E-01 |
| rs34905321 | 6   | 109131107 | T             | C            | 0.567814                | 0.995805 | 0.0013402  | 0.001033 | 1.90E-01 |
| rs891124   | 16  | 71440756  | T             | C            | 0.710131                | 0.988667 | 0.0036719  | 0.001132 | 1.20E-03 |
| rs35914833 | 14  | 94182383  | C             | T            | 0.684169                | 0.978438 | 0.000966   | 0.001111 | 3.80E-01 |

The highlighting indicates nominal statistical significance in the ever smoking dataset (P<0.05)

**Supplementary Table 2** Associations between four risk-taking loci that are genome-wide significant for BMI and the eating behaviours in the Fenland cohort

| Variant    | Implicated gene | BMI           |                       | Emotional eating |                | Uncontrolled eating |                | Cognitive restraint |                |
|------------|-----------------|---------------|-----------------------|------------------|----------------|---------------------|----------------|---------------------|----------------|
|            |                 | Beta (SE)     | <i>P</i> -val.        | Beta (SE)        | <i>P</i> -val. | Beta (SE)           | <i>P</i> -val. | Beta (SE)           | <i>P</i> -val. |
| rs891124   | CALB2           | 0.01 (0.002)  | 3.5x10 <sup>-10</sup> | 1.12 (0.71)      | 0.11           | 0.48 (0.47)         | 0.30           | 0.03 (0.51)         | 0.96           |
| rs35914833 | PRIMA1          | 0.02 (0.002)  | 5.3x10 <sup>-14</sup> | 0.06 (0.71)      | 0.93           | -0.01 (0.47)        | 0.98           | -0.11 (0.51)        | 0.83           |
| rs6762267  | CADM2           | 0.02 (0.002)  | 1.7x10 <sup>-15</sup> | 0.95 (0.65)      | 0.15           | 0.69 (0.43)         | 0.11           | 0.33 (0.47)         | 0.48           |
| rs7817124  | ZBTB10          | -0.01 (0.002) | 1.8x10 <sup>-9</sup>  | 0.31 (0.73)      | 0.67           | 0.17 (0.48)         | 0.72           | 0.37 (0.52)         | 0.48           |

SNPs were aligned to the risk taking propensity-increasing allele. Effect estimates (beta and standard error, SE) were derived from linear regressions of the variant to the named trait, adjusted for age and sex. BMI was a continuous outcome standardised within the BMI meta-analysis.

**Supplementary Table 3** Associations between the principal components and risk-taking

|             | <b>Odds ratio</b> | <b>95% CI</b>  | <b>P-value</b> |
|-------------|-------------------|----------------|----------------|
| <b>PC1</b>  | 1.008             | (1.005, 1.011) | <0.001         |
| <b>PC2</b>  | 0.995             | (0.992, 0.998) | 0.002          |
| <b>PC3</b>  | 1.004             | (1.000, 1.008) | 0.036          |
| <b>PC4</b>  | 0.990             | (0.988, 0.992) | <0.001         |
| <b>PC5</b>  | 1.012             | (1.010, 1.013) | <0.001         |
| <b>PC6</b>  | 1.004             | (1.001, 1.008) | 0.013          |
| <b>PC7</b>  | 0.995             | (0.992, 0.998) | <0.001         |
| <b>PC8</b>  | 1.009             | (1.006, 1.012) | <0.001         |
| <b>PC9</b>  | 0.998             | (0.996, 0.999) | 0.004          |
| <b>PC10</b> | 1.003             | (1.000, 1.006) | 0.037          |

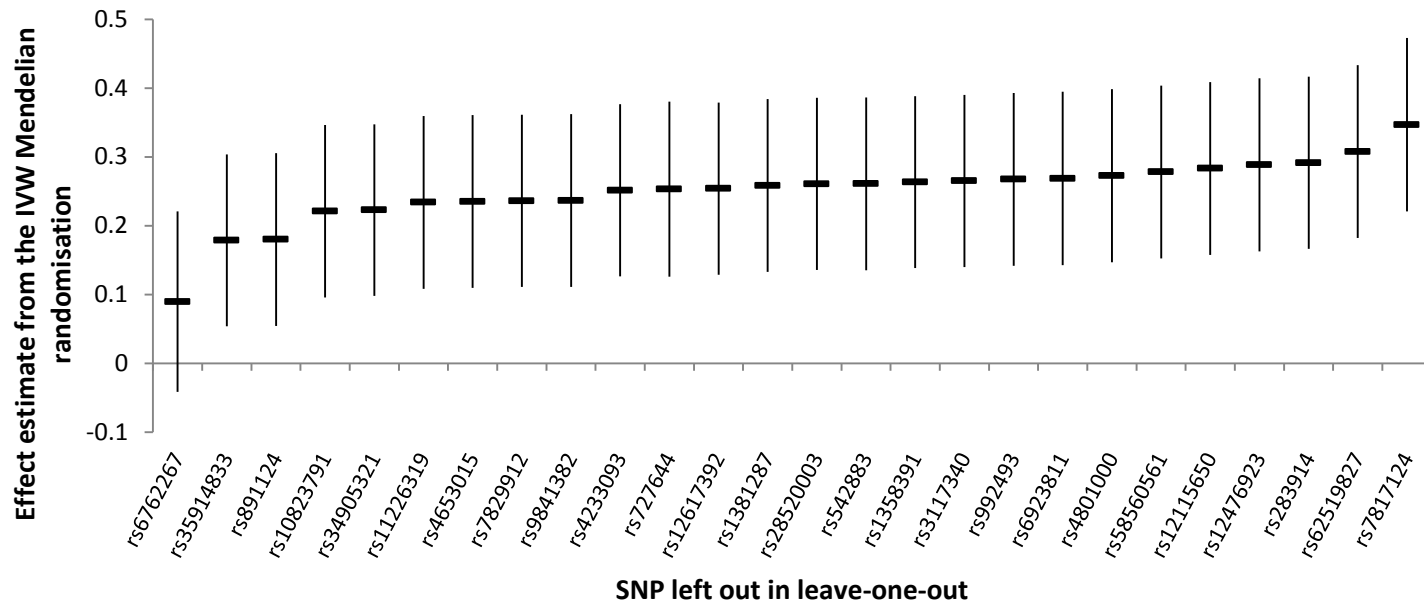

**Supplementary Figure 1. Leave-one-out analysis.** The figure shows the effect estimates and 95% confidence intervals from a series of inverse weighted variance (IVW) Mendelian randomisation analyses, each with one of the genome wide significant risk-taking propensity SNPs removed. The removed SNP is indicated on the x-axis. Comparison of the effect estimates for the four SNPs that reached genome-wide significance for BMI (rs6762267, rs35914833, rs891124 and rs7817124) with the mean of the effect estimates from the sample with that SNP removed, showed a significant difference ( $P < 0.0001$ ).

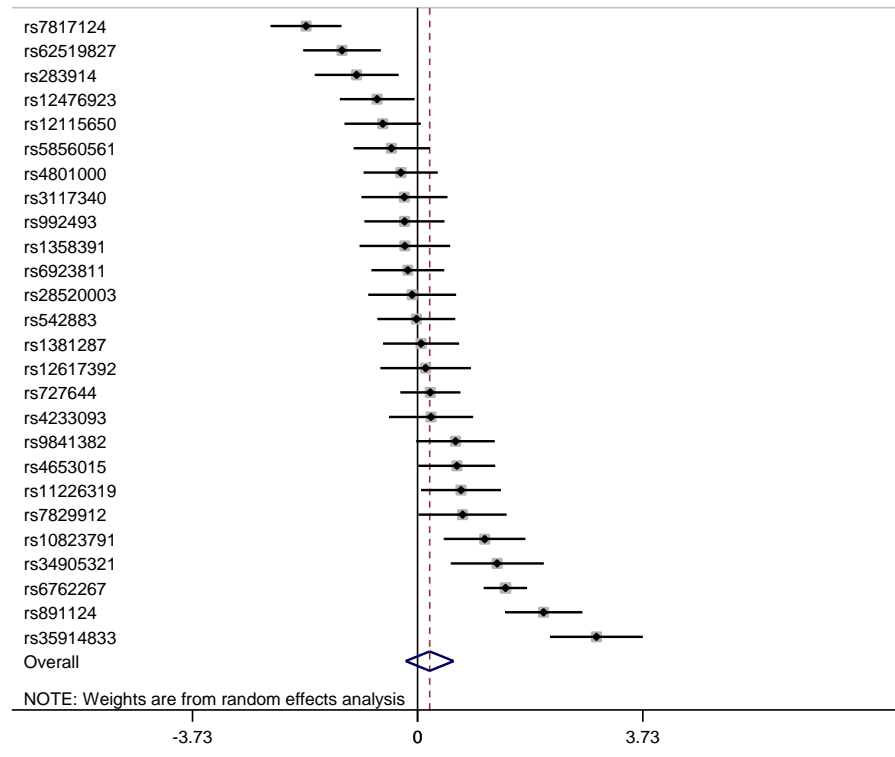

**Supplementary Figure 2.** Results of a random effects IVW Mendelian randomisation analysis of risk-taking to BMI. This analysis combined the effect estimates ascertained when treating each of the genome-wide significant SNPs for risk-taking (displayed on the y-axis) as an individual instrument. Points indicate effect estimates, bars indicate 95% confidence intervals.

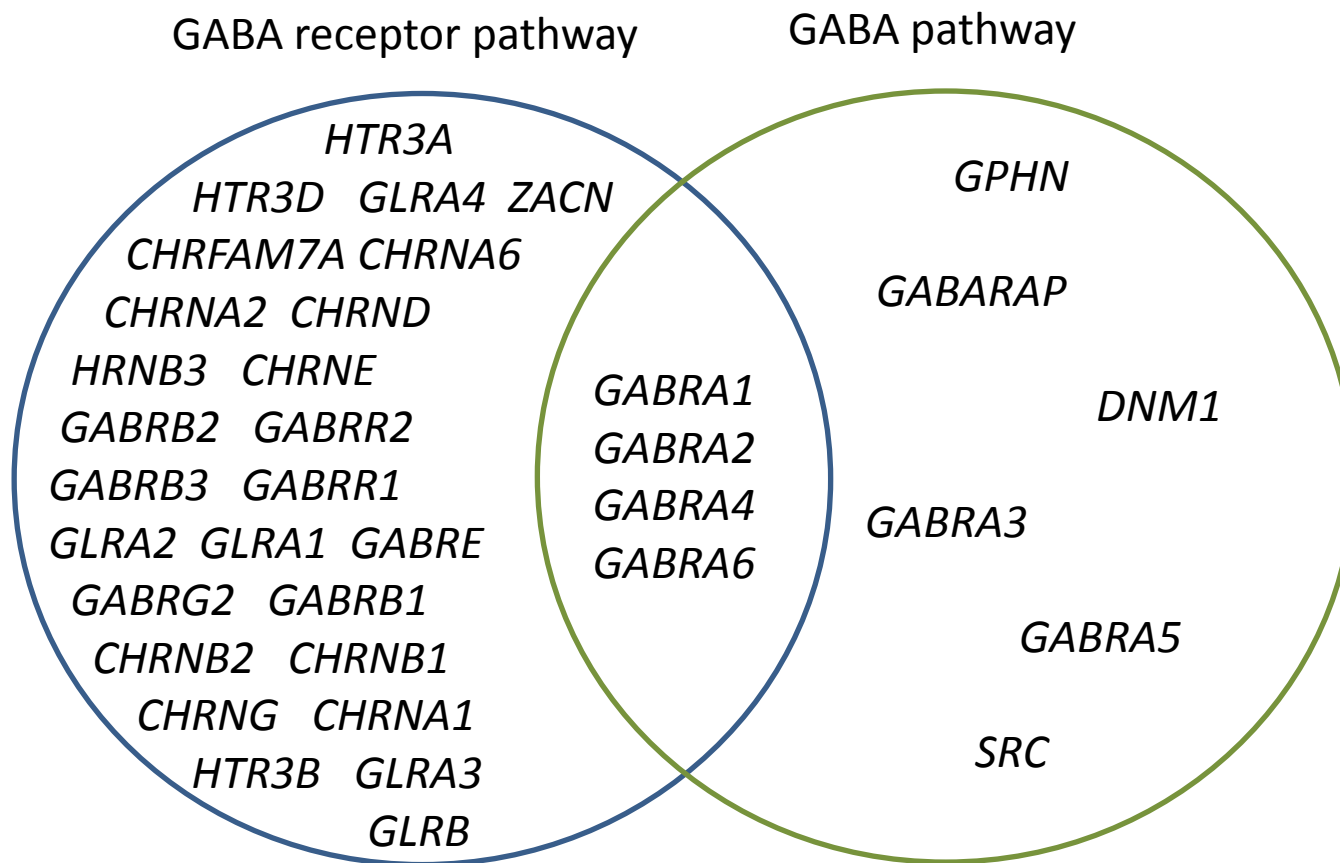

**Supplementary Figure 3** Overlap between the GABA pathway and the GABA receptor pathway
